# Supplementary material
Source: MDPI journal article supplement (https://www.mdpi.com/2673-9623/1/2/11)
Supplement: s1 [file s1]

# Supplementary Materials: Nonenzymatic Deamidation Mechanism on a Glutamine Residue with a C-Terminal Adjacent Glycine Residue: A Computational Mechanistic Study

Haruka Asai, Koichi Kato, Tomoki Nakayoshi, Yoshinobu Ishikawa, Eiji Kurimoto, Akifumi Oda and Nobuyuki Fukuishi

Table S1. Coordinates of all atoms in RC-A at B3LYP/6-31+G(d,p).

| Coordinate |          |          |          | Coordinate |          |          |          |
|------------|----------|----------|----------|------------|----------|----------|----------|
| Atom       | X        | Y        | Z        | Atom       | X        | Y        | Z        |
| N          | 3.326727 | 0.638011 | -0.46016 | O          | -2.36153 | -2.76428 | 0.113149 |
| C          | 2.10785  | -0.04537 | -0.04962 | H          | -1.80997 | -2.39821 | 0.850122 |
| H          | 1.608992 | -0.42805 | -0.94315 | C          | 4.063757 | 0.278139 | -1.5382  |
| C          | 2.442004 | -1.24286 | 0.880888 | O          | 3.754082 | -0.67853 | -2.26614 |
| C          | 1.216919 | 0.991173 | 0.649103 | C          | 5.296814 | 1.11561  | -1.8138  |
| H          | 3.165384 | -1.85607 | 0.335816 | H          | 6.17416  | 0.462425 | -1.81385 |
| H          | 2.966689 | -0.86696 | 1.766553 | H          | 5.209038 | 1.553418 | -2.81246 |
| C          | 1.249504 | -2.14712 | 1.249848 | H          | 5.448494 | 1.916019 | -1.08612 |
| H          | 0.642461 | -2.34348 | 0.363028 | H          | 3.608177 | 1.424907 | 0.112003 |
| H          | 1.644204 | -3.11328 | 1.590431 | C          | -1.97469 | 2.410836 | 0.229094 |
| C          | 0.29428  | -1.68698 | 2.343387 | O          | -2.68869 | 1.851992 | -0.62645 |
| N          | -0.10396 | 0.822172 | 0.457085 | N          | -1.94396 | 3.744379 | 0.369353 |
| C          | -1.09967 | 1.59599  | 1.181708 | H          | -1.3297  | 4.145428 | 1.063715 |
| H          | -0.58268 | 2.23185  | 1.901066 | C          | -2.74165 | 4.645279 | -0.45723 |
| O          | -0.93534 | -1.87401 | 2.256267 | H          | -2.44775 | 4.570268 | -1.50823 |
| N          | 0.824906 | -1.12214 | 3.44513  | H          | -3.80408 | 4.401412 | -0.37337 |
| H          | 1.818668 | -1.00271 | 3.57041  | H          | -2.57815 | 5.66532  | -0.11035 |
| H          | 0.215818 | -0.86385 | 4.20952  | O          | 1.723345 | 1.874448 | 1.361425 |
| P          | -2.27262 | -1.88398 | -1.26524 | H          | -0.43066 | 0.07663  | -0.18651 |
| O          | -3.43374 | -0.73959 | -1.07236 | H          | -3.07094 | 0.155467 | -0.86312 |
| O          | -0.91433 | -1.18172 | -1.3155  | H          | -1.75997 | 0.913399 | 1.729456 |
| O          | -2.70075 | -2.79447 | -2.3938  |            |          |          |          |

**Table S2.** Coordinates of all atoms in TS1-A at B3LYP/6-31+G(d,p).

| Atom | Coordinate |          |          | Atom | Coordinate |          |          |
|------|------------|----------|----------|------|------------|----------|----------|
|      | X          | Y        | Z        |      | X          | Y        | Z        |
| N    | 3.399226   | 0.294874 | -0.33211 | O    | -2.45963   | -2.21926 | -0.03785 |
| C    | 2.105495   | -0.29949 | -0.04185 | H    | -1.76462   | -1.84116 | 1.16839  |
| H    | 1.649076   | -0.61544 | -0.98885 | C    | 4.254106   | -0.20268 | -1.25752 |
| C    | 2.2187     | -1.54351 | 0.863567 | O    | 4.033843   | -1.2651  | -1.86108 |
| C    | 1.19853    | 0.777073 | 0.572886 | C    | 5.510356   | 0.606722 | -1.51105 |
| H    | 2.826723   | -2.2856  | 0.340479 | H    | 6.382775   | -0.01568 | -1.29171 |
| H    | 2.766653   | -1.28117 | 1.776651 | H    | 5.550472   | 0.872122 | -2.5715  |
| C    | 0.853474   | -2.15699 | 1.184126 | H    | 5.564772   | 1.51849  | -0.91201 |
| H    | 0.318394   | -2.40135 | 0.262853 | H    | 3.540626   | 1.227461 | 0.039603 |
| H    | 0.987804   | -3.09341 | 1.738281 | C    | -1.63427   | 2.216406 | 0.567428 |
| C    | -0.05273   | -1.28747 | 2.037861 | O    | -2.82046   | 1.989347 | 0.24252  |
| N    | -0.02975   | 0.334031 | 0.93629  | N    | -0.93825   | 3.247687 | 0.068605 |
| C    | -0.89773   | 1.331822 | 1.578462 | H    | 0.050066   | 3.281087 | 0.303503 |
| H    | -0.33019   | 1.963834 | 2.271601 | C    | -1.47426   | 4.152876 | -0.94056 |
| O    | -1.34577   | -1.57126 | 2.08852  | H    | -1.64968   | 3.633288 | -1.88856 |
| N    | 0.429475   | -0.93045 | 3.274682 | H    | -2.42014   | 4.582073 | -0.60093 |
| H    | 1.383373   | -0.6037  | 3.337163 | H    | -0.75467   | 4.956019 | -1.10102 |
| H    | -0.21573   | -0.42816 | 3.871774 | O    | 1.606791   | 1.953411 | 0.681895 |
| P    | -2.61429   | -1.38533 | -1.32227 | H    | -0.8136    | -0.26892 | -0.68022 |
| O    | -3.73768   | -0.22326 | -1.08206 | H    | -3.4243    | 0.519059 | -0.51024 |
| O    | -1.22531   | -0.54486 | -1.53882 | H    | -1.6686    | 0.791782 | 2.131217 |
| O    | -2.96174   | -2.10931 | -2.5953  |      |            |          |          |

**Table S3.** Coordinates of all atoms in INT1-A at B3LYP/6-31+G(d,p).

| Atom | Coordinate |          |          | Atom | Coordinate |          |          |
|------|------------|----------|----------|------|------------|----------|----------|
|      | X          | Y        | Z        |      | X          | Y        | Z        |
| N    | 3.728009   | 0.151306 | -0.50526 | O    | -2.10401   | -1.69662 | -0.17183 |
| C    | 2.43001    | -0.36845 | -0.10194 | H    | -1.42854   | -1.22282 | 1.22945  |
| H    | 1.928912   | -0.76147 | -0.99929 | C    | 4.519106   | -0.48555 | -1.40522 |
| C    | 2.501111   | -1.50261 | 0.923253 | O    | 4.234131   | -1.60326 | -1.86126 |
| C    | 1.56649    | 0.805104 | 0.374257 | C    | 5.785837   | 0.239847 | -1.81251 |
| H    | 3.017508   | -2.35619 | 0.478063 | H    | 6.647612   | -0.38209 | -1.55344 |
| H    | 3.089174   | -1.18628 | 1.792966 | H    | 5.784041   | 0.368351 | -2.89875 |
| C    | 1.074354   | -1.88166 | 1.312825 | H    | 5.897883   | 1.216743 | -1.33685 |
| H    | 0.507975   | -2.15573 | 0.415977 | H    | 3.907362   | 1.125633 | -0.29785 |
| H    | 1.057686   | -2.73739 | 1.991146 | C    | -1.359     | 2.109405 | 0.609626 |
| C    | 0.328616   | -0.74239 | 2.016969 | O    | -2.56906   | 1.897781 | 0.83339  |
| N    | 0.52849    | 0.552574 | 1.210944 | N    | -0.92326   | 2.72066  | -0.49948 |
| C    | -0.2859    | 1.706377 | 1.632603 | H    | 0.083755   | 2.811615 | -0.60757 |
| H    | 0.372046   | 2.556513 | 1.8328   | C    | -1.81863   | 3.173205 | -1.55838 |
| O    | -1.03454   | -0.98491 | 2.119633 | H    | -2.35251   | 2.332261 | -2.01076 |
| N    | 0.799784   | -0.58947 | 3.379527 | H    | -2.55488   | 3.878348 | -1.16229 |
| H    | 1.742164   | -0.21273 | 3.416886 | H    | -1.22229   | 3.671041 | -2.32313 |
| H    | 0.189349   | 0.030272 | 3.905167 | O    | 1.802142   | 1.951212 | -0.05652 |
| P    | -3.33981   | -1.29572 | -0.97508 | H    | -1.85911   | -0.33061 | -2.27325 |
| O    | -4.13609   | -0.09072 | -0.21485 | H    | -3.54461   | 0.615277 | 0.13919  |
| O    | -2.79021   | -0.57939 | -2.36643 | H    | -0.81617   | 1.436774 | 2.542106 |
| O    | -4.36904   | -2.32246 | -1.37007 |      |            |          |          |

**Table S4.** Coordinates of all atoms in RC-B at B3LYP/6-31+G(d,p).

| Atom | X         | Coordinate<br>Y | Z         | Atom | X         | Coordinate<br>Y | Z         |
|------|-----------|-----------------|-----------|------|-----------|-----------------|-----------|
| N    | -3.58882  | -0.189569       | -0.439722 | O    | 2.4017    | 3.870281        | -0.25536  |
| C    | -2.238212 | -0.128889       | 0.109313  | H    | 0.06957   | 0.39023         | -0.857243 |
| H    | -1.883961 | 0.900795        | 0.019531  | O    | 2.315516  | 1.947834        | 1.35709   |
| C    | -2.248295 | -0.528168       | 1.608022  | H    | 1.918772  | 1.082948        | 1.639532  |
| C    | -1.376233 | -1.069129       | -0.753705 | C    | -4.463908 | 0.84399         | -0.394354 |
| H    | -3.056224 | 0.045349        | 2.071887  | O    | -4.174814 | 1.937073        | 0.117889  |
| H    | -2.53642  | -1.582221       | 1.696209  | C    | -5.826121 | 0.594348        | -1.010537 |
| C    | -0.962215 | -0.217129       | 2.395004  | H    | -6.000261 | 1.339303        | -1.792256 |
| H    | -0.687638 | 0.833578        | 2.270697  | H    | -5.932242 | -0.404402       | -1.439967 |
| H    | -1.171351 | -0.360499       | 3.462998  | H    | -6.591759 | 0.734767        | -0.241893 |
| C    | 0.285637  | -1.032983       | 2.089264  | H    | -3.864399 | -1.07365        | -0.849445 |
| N    | -0.171007 | -0.585966       | -1.101275 | C    | 1.895897  | -1.992876       | -1.123444 |
| C    | 0.777349  | -1.316071       | -1.936597 | O    | 1.74621   | -3.138414       | -0.656559 |
| H    | 0.240701  | -2.097835       | -2.475779 | N    | 3.024284  | -1.279197       | -0.973596 |
| H    | 1.204899  | -0.612501       | -2.656025 | H    | 3.017574  | -0.273821       | -1.189262 |
| O    | 1.414255  | -0.503695       | 2.07043   | C    | 4.134909  | -1.773993       | -0.170527 |
| N    | 0.142744  | -2.3595         | 1.902348  | H    | 4.961885  | -1.067464       | -0.254608 |
| H    | -0.771486 | -2.780524       | 1.827225  | H    | 3.853533  | -1.872637       | 0.883735  |
| H    | 0.916528  | -2.873057       | 1.493227  | H    | 4.463132  | -2.751299       | -0.534341 |
| P    | 2.032084  | 2.270142        | -0.218805 | O    | -1.815313 | -2.186046       | -1.075216 |
| O    | 3.049883  | 1.585423        | -1.113769 | H    | 1.731983  | 4.403164        | 0.198859  |
| O    | 0.551642  | 2.061628        | -0.516995 |      |           |                 |           |

**Table S5.** Coordinates of all atoms in TS1-B at B3LYP/6-31+G(d,p).

| Atom | X        | Coordinate<br>Y | Z        | Atom | X        | Coordinate<br>Y | Z        |
|------|----------|-----------------|----------|------|----------|-----------------|----------|
| N    | -3.67238 | -0.30328        | -0.51601 | O    | 1.932685 | 3.947065        | 0.001872 |
| C    | -2.35067 | -0.11162        | 0.057588 | H    | 0.238516 | 1.060184        | -0.5956  |
| H    | -2.13018 | 0.964           | 0.064468 | O    | 1.93505  | 1.748354        | 1.367108 |
| C    | -2.25911 | -0.61749        | 1.50807  | H    | 1.602539 | 0.270464        | 1.586706 |
| C    | -1.32237 | -0.79879        | -0.86138 | C    | -4.72626 | 0.501251        | -0.24321 |
| H    | -3.00472 | -0.08422        | 2.102931 | O    | -4.66889 | 1.409832        | 0.602015 |
| H    | -2.52904 | -1.67994        | 1.546888 | C    | -5.99816 | 0.224533        | -1.02064 |
| C    | -0.87505 | -0.36345        | 2.103903 | H    | -6.29094 | 1.134207        | -1.55295 |
| H    | -0.61279 | 0.69444         | 2.013687 | H    | -5.89717 | -0.59282        | -1.7383  |
| H    | -0.8752  | -0.60368        | 3.173842 | H    | -6.79826 | -0.01883        | -0.31535 |
| C    | 0.253195 | -1.17783        | 1.500526 | H    | -3.70365 | -0.93188        | -1.31154 |
| N    | -0.03852 | -0.75619        | -0.42211 | C    | 2.250886 | -1.84995        | -0.78976 |
| C    | 0.90343  | -1.40135        | -1.36949 | O    | 2.379954 | -2.9901         | -0.29606 |
| H    | 0.450297 | -2.30129        | -1.79506 | N    | 3.289152 | -1.00943        | -0.93622 |
| H    | 1.084137 | -0.71206        | -2.20359 | H    | 3.118267 | -0.02503        | -1.16265 |
| O    | 1.493839 | -0.74281        | 1.695992 | C    | 4.608589 | -1.33756        | -0.41311 |
| N    | 0.165966 | -2.54124        | 1.603024 | H    | 5.298721 | -0.54126        | -0.69497 |
| H    | -0.74739 | -2.94192        | 1.436272 | H    | 4.596707 | -1.4317         | 0.678911 |
| H    | 0.918535 | -3.03765        | 1.125174 | H    | 4.962398 | -2.28209        | -0.83455 |
| P    | 1.930143 | 2.314257        | -0.05773 | O    | -1.70393 | -1.30434        | -1.93672 |
| O    | 3.032019 | 1.899029        | -1.00844 | H    | 1.345943 | 4.287108        | 0.694418 |
| O    | 0.462356 | 2.023542        | -0.71186 |      |          |                 |          |

**Table S6.** Coordinates of all atoms in INT1-B at B3LYP/6-31+G(d,p).

| Atom | Coordinate |          |          | Atom | Coordinate |          |          |
|------|------------|----------|----------|------|------------|----------|----------|
|      | X          | Y        | Z        |      | X          | Y        | Z        |
| N    | 4.133178   | -0.03517 | -0.50209 | O    | -4.64674   | -1.94523 | 0.828981 |
| C    | 2.829318   | -0.43353 | 0.011506 | H    | -3.23015   | -3.76225 | -1.07896 |
| H    | 2.638278   | -1.46746 | -0.31529 | O    | -2.10583   | -1.91909 | 0.376095 |
| C    | 2.73939    | -0.41161 | 1.538832 | H    | -1.28985   | -0.65722 | 1.1695   |
| C    | 1.750546   | 0.391008 | -0.7128  | C    | 5.21314    | -0.8552  | -0.46892 |
| H    | 3.384778   | -1.19474 | 1.943296 | O    | 5.190618   | -1.95652 | 0.102038 |
| H    | 3.125182   | 0.541569 | 1.918787 | C    | 6.462927   | -0.34341 | -1.15729 |
| C    | 1.288003   | -0.63854 | 1.959506 | H    | 6.749464   | -1.05239 | -1.93959 |
| H    | 0.934752   | -1.60424 | 1.580031 | H    | 6.338881   | 0.647178 | -1.60067 |
| H    | 1.18795    | -0.654   | 3.047806 | H    | 7.277548   | -0.30681 | -0.4283  |
| C    | 0.356959   | 0.455336 | 1.428401 | H    | 4.140752   | 0.753606 | -1.13648 |
| N    | 0.562529   | 0.598599 | -0.08088 | C    | -1.32733   | 2.261445 | -0.47723 |
| C    | -0.58065   | 1.001315 | -0.91165 | O    | -0.73711   | 3.289132 | -0.09235 |
| H    | -0.18245   | 1.19756  | -1.90938 | N    | -2.66051   | 2.187579 | -0.625   |
| H    | -1.27944   | 0.165984 | -0.98445 | H    | -3.08635   | 1.271859 | -0.80448 |
| O    | -0.98962   | 0.161004 | 1.648689 | C    | -3.53186   | 3.317877 | -0.33569 |
| N    | 0.604949   | 1.70255  | 2.125495 | H    | -4.55217   | 3.04676  | -0.6103  |
| H    | 1.596594   | 1.922272 | 2.121113 | H    | -3.50794   | 3.581689 | 0.72771  |
| H    | 0.134769   | 2.463863 | 1.63623  | H    | -3.22968   | 4.196421 | -0.9128  |
| P    | -3.46033   | -1.72531 | -0.29169 | O    | 1.968275   | 0.748291 | -1.8823  |
| O    | -3.80395   | -0.45266 | -1.02723 | H    | -4.38851   | -2.59071 | 1.504005 |
| O    | -3.69329   | -2.95774 | -1.35683 |      |            |          |          |

**Table S7.** Coordinates of all atoms in RC-C at B3LYP/6-31+G(d,p).

| Atom | Coordinate |          |          | Atom | Coordinate |          |          |
|------|------------|----------|----------|------|------------|----------|----------|
|      | X          | Y        | Z        |      | X          | Y        | Z        |
| N    | 3.528144   | -0.37817 | 0.837352 | H    | 3.402862   | -0.70204 | 1.788609 |
| C    | 2.373328   | -0.5113  | -0.04082 | N    | 0.057537   | 0.365002 | 0.362486 |
| H    | 2.474218   | 0.252883 | -0.81116 | H    | -0.82643   | 0.215392 | 0.885689 |
| C    | 2.377632   | -1.90899 | -0.72012 | C    | -0.06773   | 1.117103 | -0.88236 |
| C    | 1.120421   | -0.32292 | 0.829552 | C    | -0.61853   | 2.51676  | -0.59942 |
| H    | 3.341396   | -1.99573 | -1.23012 | H    | 0.891931   | 1.182471 | -1.39086 |
| H    | 2.372902   | -2.67243 | 0.06523  | H    | -0.76707   | 0.607908 | -1.55389 |
| C    | 1.272262   | -2.17234 | -1.76471 | O    | -1.80325   | 2.682662 | -0.24976 |
| O    | 1.099601   | -0.87182 | 1.945374 | N    | 0.23097    | 3.544124 | -0.74548 |
| H    | 1.201034   | -1.34364 | -2.47335 | H    | 1.186972   | 3.353004 | -1.01037 |
| H    | 1.566293   | -3.05555 | -2.34538 | C    | -0.15742   | 4.929936 | -0.49962 |
| C    | -0.13893   | -2.44069 | -1.25388 | H    | -1.03364   | 5.190405 | -1.09866 |
| O    | -1.12063   | -1.84171 | -1.7341  | H    | -0.39658   | 5.085963 | 0.556551 |
| N    | -0.28087   | -3.38023 | -0.29975 | H    | 0.674717   | 5.575614 | -0.77899 |
| H    | 0.505302   | -3.87662 | 0.092099 | P    | -3.7277    | -0.41647 | 0.685123 |
| H    | -1.20208   | -3.60227 | 0.052639 | O    | -2.44813   | -0.27126 | 1.506638 |
| C    | 4.713695   | 0.145383 | 0.44009  | O    | -3.89112   | 0.928546 | -0.24216 |
| O    | 4.905985   | 0.55147  | -0.71698 | O    | -3.54513   | -1.62011 | -0.41704 |
| C    | 5.800183   | 0.212381 | 1.494146 | H    | -2.66369   | -1.64347 | -0.86094 |
| H    | 5.488208   | -0.18212 | 2.463706 | O    | -5.04655   | -0.68192 | 1.375963 |
| H    | 6.668374   | -0.35194 | 1.141765 | H    | -3.08417   | 1.500416 | -0.22792 |
| H    | 6.10876    | 1.254796 | 1.61552  |      |            |          |          |

**Table S8.** Coordinates of all atoms in TS1-C at B3LYP/6-31+G(d,p).

| Atom | X        | Coordinate<br>Y | Z        | Atom | X        | Coordinate<br>Y | Z        |
|------|----------|-----------------|----------|------|----------|-----------------|----------|
| N    | -3.83646 | -0.56674        | -0.54862 | H    | -3.69612 | -1.48715        | -0.94792 |
| C    | -2.6719  | 0.043502        | 0.059805 | N    | -0.19714 | 0.06434         | -0.20667 |
| H    | -2.72605 | 1.121645        | -0.10074 | H    | 1.210006 | -0.97485        | -0.89238 |
| C    | -2.59496 | -0.24593        | 1.593366 | C    | -0.19148 | 1.530312        | -0.36438 |
| C    | -1.39102 | -0.5665         | -0.50909 | C    | 1.214076 | 2.079049        | -0.6028  |
| H    | -3.43261 | 0.26193         | 2.078813 | H    | -0.75806 | 1.806934        | -1.26274 |
| H    | -2.74831 | -1.32123        | 1.742408 | H    | -0.64854 | 2.068366        | 0.472489 |
| C    | -1.28541 | 0.214739        | 2.25078  | O    | 1.978882 | 1.568247        | -1.4433  |
| O    | -1.42507 | -1.71448        | -0.96631 | N    | 1.538781 | 3.191424        | 0.075077 |
| H    | -1.20949 | 1.303871        | 2.23559  | H    | 0.908014 | 3.526143        | 0.789777 |
| H    | -1.29169 | -0.07524        | 3.307425 | C    | 2.806925 | 3.889087        | -0.10903 |
| C    | -0.00217 | -0.36213        | 1.660886 | H    | 3.639323 | 3.315855        | 0.311673 |
| O    | 1.090873 | 0.342137        | 1.97513  | H    | 2.995754 | 4.048925        | -1.17309 |
| N    | 0.137232 | -1.73611        | 1.741606 | H    | 2.747189 | 4.853767        | 0.395049 |
| H    | -0.63277 | -2.28927        | 1.385536 | P    | 3.337603 | -1.4241         | -0.37486 |
| H    | 1.039632 | -2.07343        | 1.415534 | O    | 1.927005 | -1.61561        | -1.16836 |
| C    | -5.04102 | 0.046855        | -0.64364 | O    | 4.041609 | -0.13916        | -1.10295 |
| O    | -5.24372 | 1.183243        | -0.18698 | O    | 3.013104 | -1.0585         | 1.088034 |
| C    | -6.13562 | -0.73318        | -1.34316 | H    | 1.923008 | -0.15658        | 1.631585 |
| H    | -5.81169 | -1.7169         | -1.69023 | O    | 4.212214 | -2.6266         | -0.62003 |
| H    | -6.97607 | -0.85701        | -0.65413 | H    | 3.394905 | 0.598252        | -1.211   |
| H    | -6.49102 | -0.15183        | -2.19891 |      |          |                 |          |

**Table S9.** Coordinates of all atoms in INT1-C at B3LYP/6-31+G(d,p).

| Atom | X        | Coordinate<br>Y | Z        | Atom | X        | Coordinate<br>Y | Z        |
|------|----------|-----------------|----------|------|----------|-----------------|----------|
| N    | 4.10914  | -0.26957        | 0.492042 | H    | 4.015966 | 0.305992        | 1.318282 |
| C    | 2.928411 | -0.95832        | 0.007034 | N    | 0.577373 | -0.23041        | -0.445   |
| H    | 3.261314 | -1.55179        | -0.85239 | H    | -3.06846 | 1.132678        | 0.655568 |
| C    | 2.326292 | -1.89256        | 1.055806 | C    | -0.35793 | 0.741455        | -1.03872 |
| C    | 1.90376  | 0.04874         | -0.5477  | C    | -0.64901 | 1.978829        | -0.17387 |
| H    | 3.050041 | -2.67492        | 1.301564 | H    | 0.053616 | 1.070428        | -1.99687 |
| H    | 2.121756 | -1.34435        | 1.984424 | H    | -1.30831 | 0.245199        | -1.22484 |
| C    | 1.055961 | -2.50477        | 0.479673 | O    | -1.77887 | 2.174196        | 0.326338 |
| O    | 2.309149 | 1.095262        | -1.08741 | N    | 0.353985 | 2.850137        | -0.01958 |
| H    | 1.287142 | -3.00863        | -0.46505 | H    | 1.24401  | 2.598286        | -0.44485 |
| H    | 0.625943 | -3.24915        | 1.152932 | C    | 0.229596 | 4.068198        | 0.771812 |
| C    | -0.04557 | -1.4801         | 0.190671 | H    | -0.53614 | 4.727358        | 0.352411 |
| O    | -0.91142 | -2.06514        | -0.72932 | H    | -0.04271 | 3.835811        | 1.805725 |
| N    | -0.7613  | -1.14173        | 1.40953  | H    | 1.189584 | 4.584552        | 0.761651 |
| H    | -0.15372 | -0.66444        | 2.070796 | P    | -4.42658 | -0.49801        | -0.04171 |
| H    | -1.55725 | -0.5329         | 1.230801 | O    | -3.78045 | 0.54903         | 1.03028  |
| C    | 5.302955 | -0.27536        | -0.15699 | O    | -5.41583 | 0.439594        | -0.97935 |
| O    | 5.489358 | -0.9078         | -1.20661 | O    | -3.31065 | -1.01932        | -0.94796 |
| C    | 6.411292 | 0.534124        | 0.485033 | H    | -1.83037 | -1.67244        | -0.70905 |
| H    | 6.126251 | 0.980924        | 1.440213 | O    | -5.31794 | -1.44197        | 0.720981 |
| H    | 7.278789 | -0.11376        | 0.637298 | H    | -4.92244 | 0.859673        | -1.69944 |
| H    | 6.70808  | 1.330175        | -0.20445 |      |          |                 |          |

**Table S10.** Coordinates of all atoms in INT2 at B3LYP/6-31+G(d,p).

| Atom | X        | Coordinate<br>Y | Z        | Atom | X        | Coordinate<br>Y | Z        |
|------|----------|-----------------|----------|------|----------|-----------------|----------|
| N    | -3.97444 | -0.37852        | -0.71376 | H    | -3.74722 | -0.11561        | -1.66345 |
| C    | -2.89977 | -0.856          | 0.134827 | N    | -0.61274 | -0.02973        | 0.730839 |
| H    | -3.36825 | -1.10612        | 1.094296 | H    | 2.457104 | -1.76623        | -1.05579 |
| C    | -2.23204 | -2.10991        | -0.433   | C    | 0.212168 | 1.056786        | 1.262218 |
| C    | -1.91697 | 0.283663        | 0.470201 | C    | 0.712898 | 2.044165        | 0.206018 |
| H    | -2.95046 | -2.93462        | -0.42516 | H    | -0.35431 | 1.577423        | 2.036669 |
| H    | -1.95879 | -1.9424         | -1.48228 | H    | 1.096253 | 0.615094        | 1.725589 |
| C    | -1.00828 | -2.46613        | 0.405913 | O    | 1.224381 | 1.6482          | -0.86525 |
| O    | -2.33284 | 1.442872        | 0.587413 | N    | 0.642017 | 3.342071        | 0.521901 |
| H    | -1.30126 | -2.65619        | 1.443409 | H    | 0.162347 | 3.607403        | 1.370759 |
| H    | -0.52322 | -3.37349        | 0.034228 | C    | 1.161463 | 4.398971        | -0.34117 |
| C    | 0.047121 | -1.3589         | 0.421695 | H    | 2.214754 | 4.219494        | -0.57017 |
| O    | 0.948458 | -1.6555         | 1.441587 | H    | 0.601606 | 4.445904        | -1.28004 |
| N    | 0.737663 | -1.27032        | -0.87853 | H    | 1.064404 | 5.349621        | 0.18276  |
| H    | 0.853998 | -0.28676        | -1.13933 | P    | 4.148548 | -0.69329        | -0.17517 |
| H    | 0.1884   | -1.71292        | -1.61073 | O    | 3.453609 | -1.81826        | -1.13701 |
| C    | -5.2468  | -0.18385        | -0.27818 | O    | 3.923531 | 0.725155        | -0.9806  |
| O    | -5.60001 | -0.43335        | 0.883528 | O    | 3.344882 | -0.63011        | 1.129594 |
| C    | -6.22595 | 0.349394        | -1.30409 | H    | 1.862742 | -1.28009        | 1.259789 |
| H    | -7.07287 | -0.33879        | -1.37421 | O    | 5.634339 | -0.94708        | -0.13977 |
| H    | -6.60899 | 1.312964        | -0.95527 | H    | 3.002638 | 1.055654        | -0.91275 |
| H    | -5.78855 | 0.479873        | -2.2965  |      |          |                 |          |

**Table S11.** Coordinates of all atoms in TS2 at B3LYP/6-31+G(d,p).

| Atom | X        | Coordinate<br>Y | Z        | Atom | X        | Coordinate<br>Y | Z        |
|------|----------|-----------------|----------|------|----------|-----------------|----------|
| N    | -3.98724 | -0.36997        | -0.6943  | H    | -3.77843 | -0.10847        | -1.6486  |
| C    | -2.89308 | -0.81718        | 0.144091 | N    | -0.61532 | 0.050837        | 0.721748 |
| H    | -3.343   | -1.06406        | 1.113455 | H    | 1.720404 | -1.56343        | -0.99509 |
| C    | -2.20906 | -2.06659        | -0.41544 | C    | 0.19878  | 1.145543        | 1.249754 |
| C    | -1.92778 | 0.344127        | 0.452561 | C    | 0.777152 | 2.069753        | 0.177603 |
| H    | -2.91366 | -2.90256        | -0.39192 | H    | -0.40025 | 1.712917        | 1.963421 |
| H    | -1.95508 | -1.9101         | -1.47174 | H    | 1.042872 | 0.7028          | 1.783173 |
| C    | -0.97357 | -2.39854        | 0.417585 | O    | 1.20435  | 1.62098         | -0.91195 |
| O    | -2.35474 | 1.498561        | 0.543889 | N    | 0.868179 | 3.3648          | 0.492536 |
| H    | -1.25859 | -2.59784        | 1.45538  | H    | 0.481534 | 3.678866        | 1.372169 |
| H    | -0.4694  | -3.29471        | 0.044049 | C    | 1.490742 | 4.3525          | -0.38572 |
| C    | 0.061934 | -1.27223        | 0.462776 | H    | 2.534968 | 4.09213         | -0.57772 |
| O    | 1.014285 | -1.53101        | 1.378973 | H    | 0.960553 | 4.406115        | -1.34046 |
| N    | 0.706924 | -1.13188        | -0.93822 | H    | 1.446906 | 5.32413         | 0.10516  |
| H    | 0.831465 | -0.11996        | -1.14189 | P    | 4.031054 | -0.87061        | -0.20522 |
| H    | 0.120078 | -1.53066        | -1.67114 | O    | 3.202125 | -1.83211        | -1.10515 |
| C    | -5.25608 | -0.19225        | -0.23916 | O    | 4.040321 | 0.618866        | -0.95924 |
| O    | -5.58434 | -0.43671        | 0.930477 | O    | 3.237605 | -0.62363        | 1.137043 |
| C    | -6.26108 | 0.313526        | -1.25347 | H    | 2.072204 | -1.09061        | 1.220867 |
| H    | -7.09363 | -0.39345        | -1.30718 | O    | 5.494562 | -1.22482        | -0.01747 |
| H    | -6.65997 | 1.270419        | -0.90419 | H    | 3.147508 | 1.010607        | -0.985   |
| H    | -5.84124 | 0.447526        | -2.25293 |      |          |                 |          |

**Table S12.** Coordinates of all atoms in PC at B3LYP/6-31+G(d,p).

| Atom | X        | Coordinate<br>Y | Z        | Atom | X        | Coordinate<br>Y | Z        |
|------|----------|-----------------|----------|------|----------|-----------------|----------|
| N    | 3.573704 | -0.86186        | 0.641598 | H    | 3.28379  | -0.8296         | 1.609842 |
| C    | 2.54463  | -0.89664        | -0.37244 | N    | 0.659322 | 0.524626        | -1.21309 |
| H    | 3.050652 | -1.10986        | -1.32263 | H    | -1.14508 | -1.11344        | 2.287346 |
| C    | 1.485157 | -1.96695        | -0.09764 | C    | 0.104289 | 1.852391        | -1.48343 |
| C    | 1.890774 | 0.48067         | -0.53958 | C    | -0.59246 | 2.440517        | -0.25155 |
| H    | 1.967842 | -2.9455         | -0.03643 | H    | 0.90616  | 2.502919        | -1.83285 |
| H    | 1.000019 | -1.7687         | 0.865158 | H    | -0.63796 | 1.741006        | -2.27519 |
| C    | 0.451774 | -1.9636         | -1.22216 | O    | -1.14045 | 1.714241        | 0.595068 |
| O    | 2.406292 | 1.5156          | -0.14949 | N    | -0.60896 | 3.779593        | -0.18064 |
| H    | 0.885552 | -2.368          | -2.147   | H    | -0.10023 | 4.312674        | -0.87238 |
| H    | -0.41289 | -2.58184        | -0.97202 | C    | -1.30405 | 4.503953        | 0.879718 |
| C    | -0.08908 | -0.59881        | -1.57211 | H    | -2.35304 | 4.200542        | 0.924632 |
| O    | -1.15023 | -0.45692        | -2.17848 | H    | -0.84119 | 4.310439        | 1.851975 |
| N    | -0.43752 | -0.61416        | 2.835421 | H    | -1.24716 | 5.570163        | 0.661478 |
| H    | -0.42414 | 0.335212        | 2.46615  | P    | -3.68036 | -1.29401        | 0.341157 |
| H    | -0.77846 | -0.55348        | 3.792465 | O    | -2.4285  | -1.94637        | 0.906671 |
| C    | 4.90027  | -0.76145        | 0.353699 | O    | -3.60293 | 0.331196        | 0.604505 |
| O    | 5.323971 | -0.73004        | -0.80949 | O    | -3.65284 | -1.4148         | -1.30489 |
| C    | 5.835907 | -0.70673        | 1.54299  | H    | -2.76865 | -1.19565        | -1.66459 |
| H    | 6.549814 | -1.53173        | 1.467316 | O    | -5.05917 | -1.73964        | 0.77256  |
| H    | 6.402431 | 0.227958        | 1.500336 | H    | -2.69129 | 0.6906          | 0.575287 |
| H    | 5.320897 | -0.76711        | 2.504259 |      |          |                 |          |

**Table S13.** Electronic and zero-point energies for all structures in CH<sub>3</sub>COGlnNH<sub>3</sub>CH<sub>3</sub> at MP2/6-311+G(2d,2p)//B3LYP/6-31+G(d,p).

|      | Zero-point correction at<br>B3LYP/6-31+G(d,p) | Single-point Energy at<br>MP2/6-311+G(2d,2p) | Sum of single-point and<br>zero-point energies |
|------|-----------------------------------------------|----------------------------------------------|------------------------------------------------|
| RC   | 0.279893                                      | -1345.1288275                                | -1344.848935                                   |
| TS1  | 0.278436                                      | -1345.0904735                                | -1344.812038                                   |
| INT1 | 0.281998                                      | -1345.1104289                                | -1344.828431                                   |
| INT2 | 0.282645                                      | -1345.1128434                                | -1344.830198                                   |
| TS2  | 0.277784                                      | -1345.0984595                                | -1344.820676                                   |
| PC   | 0.277820                                      | -1345.1123404                                | -1344.83452                                    |

**Table S14.** Electronic and zero-point energies for all structures in CH<sub>3</sub>COGlnNH<sub>3</sub>CH<sub>3</sub> at MP2/6-311+G(2d,2p)//B3LYP/6-31+G(d,p).

|      | Zero-point correction at<br>B3LYP/6-31+G(d,p) | Single-point Energy at<br>MP2/6-311+G(2d,2p) | Sum of single-point and<br>zero-point energies |
|------|-----------------------------------------------|----------------------------------------------|------------------------------------------------|
| RC   | 0.337248                                      | -1552.7146803                                | -1552.377432                                   |
| TS1  | 0.335963                                      | -1552.6808827                                | -1552.344920                                   |
| INT1 | 0.33754                                       | -1552.6937447                                | -1552.356205                                   |
| INT2 | 0.339362                                      | -1552.6990823                                | -1552.359720                                   |
| TS2  | 0.33455                                       | -1552.6846848                                | -1552.350135                                   |
| PC   | 0.335014                                      | -1552.7011125                                | -1552.366099                                   |
